# Supplementary material for: The highly selective aerobic oxidation of cyclohexane to cyclohexanone and cyclohexanol over V2O5@TiO2 under simulated solar light irradiation
Source: Royal Society of Chemistry journal article supplement (doi:10.1039/c6gc02748b), 2016-11-29
Supplement: c6gc02748b1.pdf [file c6gc02748b1.pdf]

**Highly selective aerobic oxidation of cyclohexane to cyclohexanone  
and cyclohexanol over  $V_2O_5@TiO_2$  under simulated solar light  
irradiation**

Dexin Yang<sup>1,2</sup>, Tianbin Wu<sup>1,2\*</sup>, Chunjun Chen<sup>1,2</sup>, Weiwei Guo<sup>1,2</sup>, Huizhen Liu<sup>1,2</sup>,  
Buxing Han<sup>1,2\*</sup>

1. Beijing National Laboratory for Molecular Sciences, Key Laboratory of Colloid and Interface and Thermodynamics, Institute of Chemistry, Chinese Academy of Sciences, Beijing 100190, China.

2. University of Chinese Academy of Sciences, Beijing 100049, P. R. China

\* To whom correspondence should be addressed. Email: wtb@iccas.ac.cn,  
hanbx@iccas.ac.cn

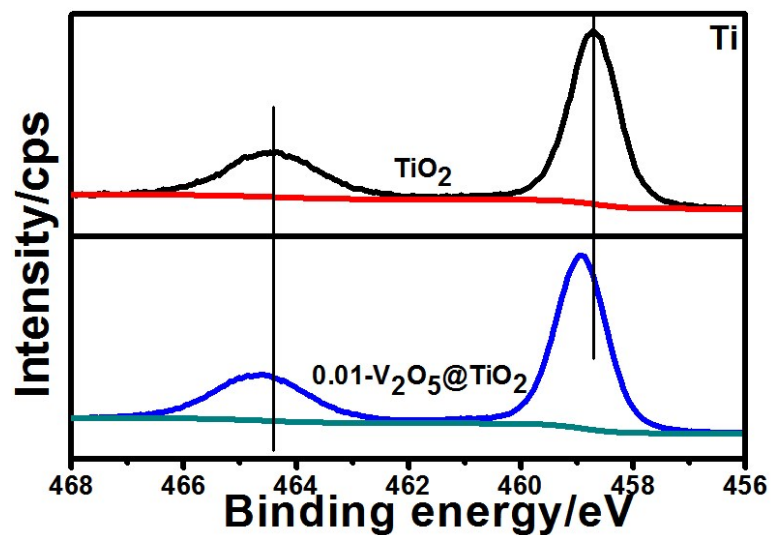

Figure S1. XPS spectra of Ti2p in the TiO<sub>2</sub> and 0.01-V<sub>2</sub>O<sub>5</sub>@TiO<sub>2</sub>.

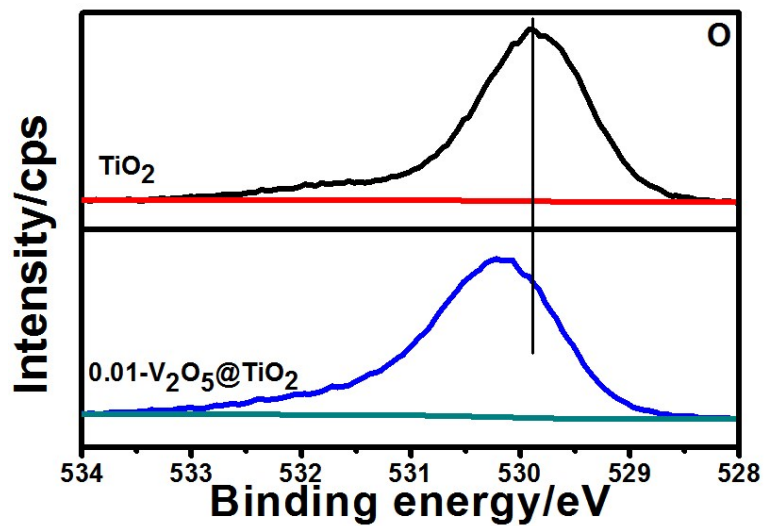

Figure S2. XPS spectra of O1s in the TiO<sub>2</sub> and 0.01-V<sub>2</sub>O<sub>5</sub>@TiO<sub>2</sub>.

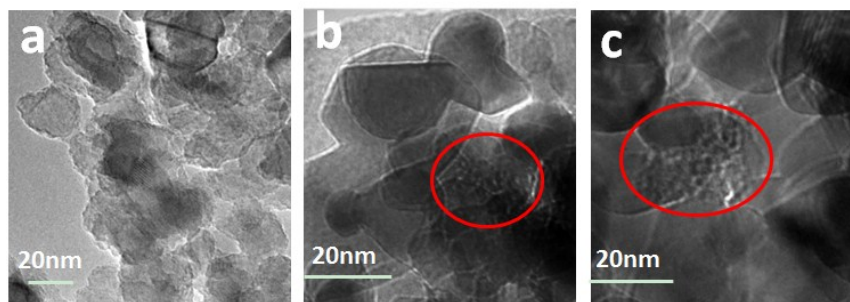

**Figure S3.** HRTEM images of 0.03-V<sub>2</sub>O<sub>5</sub>@TiO<sub>2</sub> (a), 0.05-V<sub>2</sub>O<sub>5</sub>@TiO<sub>2</sub> (b), 0.07-V<sub>2</sub>O<sub>5</sub>@TiO<sub>2</sub> (c).

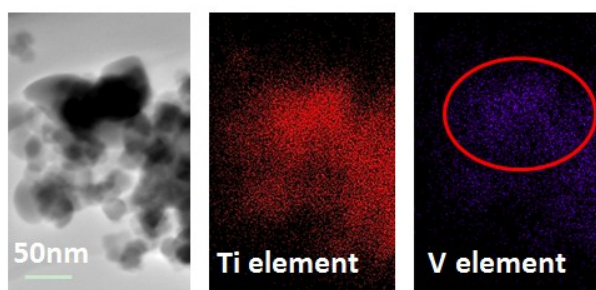

**Figure S4.** EDX images of 0.03-V<sub>2</sub>O<sub>5</sub>@TiO<sub>2</sub>.

No obvious aggregation of V species in the catalysts of 0.03-V<sub>2</sub>O<sub>5</sub>@TiO<sub>2</sub> is observed in Figure S3a. However, with the increasing of V content, it is found from Figure S 3b and Figure S 3c that aggregation of V species exists in catalyst, which would be detrimental to photocatalytic oxidation of cyclohexane. Meanwhile, to further understand the catalysts of 0.03-V<sub>2</sub>O<sub>5</sub>@TiO<sub>2</sub>, the element mapping was performed in Figure S4, from which we could see there are slight aggregation in the catalysts.
